# Supplementary material for: Accessing needed sexual health services during the COVID-19 pandemic in British Columbia, Canada: a survey of sexual health service clients
Source: HighWire-hosted journal article supplement (doi:10.1136/sextrans-2021-055013), 2021-11-05
Supplement: sextrans-2021-055013supp002_data_supplement.pdf [file sextrans-2021-055013supp002_data_supplement.pdf]

**Supplemental Table 1: Sexual health service needs among survey participants**

| <b>Variable</b>                                                    | <b>Total with sexual health need<br/>N=706</b> | <b>At least one need unmet<br/>N=365</b> | <b>All needs met<br/>N=341</b> | <b>Unadjusted Odds Ratio<br/>[95% Confidence Interval]</b> |
|--------------------------------------------------------------------|------------------------------------------------|------------------------------------------|--------------------------------|------------------------------------------------------------|
| <b>Age:</b> median [inter-quartile range]                          | 32 [26-39]                                     | 31 [26-38]                               | 32 [26.75-39]                  | 0.99 (0.98-1.00)                                           |
| <b>Gender identity<sup>1</sup></b>                                 |                                                |                                          |                                |                                                            |
| Man                                                                | 332/704 (47%)                                  | 158/364 (43%)                            | 174/340 (51%)                  | Ref                                                        |
| Woman                                                              | 334/704 (47%)                                  | 185/364 (51%)                            | 149/340 (44%)                  | <b>1.37 (1.01-1.86)</b>                                    |
| Non-binary / Genderfluid / Other                                   | 38/704 (5%)                                    | 21/364 (6%)                              | 17/340 (5%)                    | 1.36 (0.69-2.70)                                           |
| <b>Sexual identity</b>                                             |                                                |                                          |                                |                                                            |
| Straight (heterosexual)                                            | 311/704 (44%)                                  | 166/363 (46%)                            | 145/341 (43%)                  | Ref                                                        |
| Sexual minority (e.g., gay, lesbian, homosexual, queer, pansexual) | 393/704 (56%)                                  | 197/363 (54%)                            | 196/341 (57%)                  | 0.88 (0.65-1.18)                                           |
| <b>Gender of sex partners prior to the pandemic</b>                |                                                |                                          |                                |                                                            |
| Men who have sex with women only                                   | 103/693 (15%)                                  | 64/359 (18%)                             | 39/334 (12%)                   | Ref                                                        |
| Men who have sex with men and women                                | 28/693 (4%)                                    | 16/359 (4%)                              | 12/334 (4%)                    | 0.81 (0.35-1.93)                                           |
| Men who have sex with men only                                     | 187/693 (27%)                                  | 71/359 (20%)                             | 116/334 (35%)                  | <b>0.37 (0.23-0.61)</b>                                    |
| Women who have sex with men only                                   | 242/693 (35%)                                  | 127/359 (35%)                            | 115/334 (34%)                  | 0.67 (0.42-1.07)                                           |
| Women who have sex with men and women                              | 73/693 (11%)                                   | 49/359 (14%)                             | 24/334 (7%)                    | 1.24 (0.67-2.35)                                           |
| Women who have sex with women only                                 | 6/693 (1%)                                     | 3/359 (1%)                               | 3/334 (1%)                     | 0.61 (0.11-3.43)                                           |
| Other                                                              | 54/693 (8%)                                    | 29/359 (8%)                              | 25/334 (7%)                    | 0.71 (0.36-1.38)                                           |
| <b>Race/ethnicity</b>                                              |                                                |                                          |                                |                                                            |
| Indigenous <sup>2</sup>                                            | 31/697 (4%)                                    | 21/362 (6%)                              | 10/335 (3%)                    | 1.93 (0.91-4.36)                                           |
| Racialized minority, non-Indigenous                                | 163/697 (23%)                                  | 79/362 (22%)                             | 84/335 (25%)                   | 0.87 (0.61-1.23)                                           |
| White                                                              | 503/697 (72%)                                  | 262/362 (72%)                            | 241/335 (72%)                  | Ref                                                        |
| <b>Education</b>                                                   |                                                |                                          |                                |                                                            |
| High school or less                                                | 88/702 (13%)                                   | 46/364 (13%)                             | 42/338 (12%)                   | 1.02 (0.65-1.60)                                           |
| Post-secondary or more                                             | 614/702 (87%)                                  | 318/364 (87%)                            | 296/338 (88%)                  | Ref                                                        |

<sup>1</sup> In a separate question, 23/697 (3%) of participants identified as transgender, have lived experience as trans, or a history of gender transition

<sup>2</sup> 2/28 (7%) of Indigenous participants identified as Two-Spirit.

| Variable                                                                          | Total with sexual health need<br>N=706 | At least one need unmet<br>N=365 | All needs met<br>N=341 | Unadjusted Odds Ratio<br>[95% Confidence Interval] |
|-----------------------------------------------------------------------------------|----------------------------------------|----------------------------------|------------------------|----------------------------------------------------|
| <b>Employment status prior to pandemic</b>                                        |                                        |                                  |                        |                                                    |
| Employed full-time (30+ hours/week)                                               | 461/701 (66%)                          | 232/363 (64%)                    | 229/338 (68%)          | 1.08 (0.62-1.15)                                   |
| Not employed full-time                                                            | 240/701 (34%)                          | 131/363 (36%)                    | 109/338 (32%)          | Ref                                                |
| <b>Yearly income prior to the pandemic</b>                                        |                                        |                                  |                        |                                                    |
| < \$20,000                                                                        | 141/683 (21%)                          | 81/360 (23%)                     | 60/323 (19%)           | 1.27 (0.88-1.85)                                   |
| \$20,000 or more                                                                  | 542/683 (79%)                          | 279/360 (78%)                    | 263/323 (81%)          | Ref                                                |
| <b>Greater difficulty meeting own/household's financial needs during pandemic</b> | 311/694 (45%)                          | 167/358 (47%)                    | 144/336 (43%)          | 1.17 (0.86-1.57)                                   |
| <b>Type of sexual health service need</b>                                         |                                        |                                  |                        |                                                    |
| Testing for a new, specific reason (e.g., symptoms)                               | 183/706 (26%)                          | 79/365 (22%)                     | 104/341 (30%)          | 1.27 (0.79-2.04)                                   |
| Testing as per usual testing routine                                              | 403/706 (57%)                          | 241/365 (66%)                    | 162/341 (48%)          | <b>2.48 (1.64-3.79)</b>                            |
| Speak with a health care provider about a sexual health concern                   | 149/692 (22%)                          | 87/355 (25%)                     | 62/337 (18%)           | 1.44 (1.00-2.08)                                   |
| Access birth control                                                              | 95/692 (14%)                           | 34/355 (10%)                     | 61/337 (18%)           | <b>0.48 (0.30-0.75)</b>                            |
| Access to HIV pre-exposure prophylaxis                                            | 68/692 (10%)                           | 21/355 (6%)                      | 47/337 (14%)           | <b>0.39 (0.22-0.66)</b>                            |
| Access treatment for a new STI                                                    | 45/692 (7%)                            | 14/355 (4%)                      | 31/337 (9%)            | <b>0.40 (0.21-0.76)</b>                            |
| Access treatment for ongoing symptoms (e.g., warts)                               | 36/692 (5%)                            | 17/355 (5%)                      | 19/337 (6%)            | 0.84 (0.43-1.65)                                   |
| Get a pregnancy test                                                              | 25/692 (4%)                            | 9/355 (3%)                       | 16/337 (5%)            | 0.52 (0.22-1.17)                                   |
| Access to condoms                                                                 | 31/692 (4%)                            | 16/355 (5%)                      | 15/337 (4%)            | 1.01 (0.49-2.10)                                   |
| Access to harm reduction supplies                                                 | 7/692 (1%)                             | 5/355 (1%)                       | 2/337 (1%)             | 2.39 (0.51-16.79)                                  |
| <b>Worry about getting COVID-19 during Phase 1</b>                                |                                        |                                  |                        |                                                    |
| Not at all worried                                                                | 60/705 (9%)                            | 31/364 (9%)                      | 29/341 (9%)            | Ref                                                |
| Somewhat worried                                                                  | 332/705 (47%)                          | 163/364 (45%)                    | 169/341 (50%)          | 0.90 (0.52-1.57)                                   |
| Very worried                                                                      | 196/705 (28%)                          | 108/364 (30%)                    | 88/341 (26%)           | 1.15 (0.64-2.05)                                   |
| Extremely worried                                                                 | 117/705 (17%)                          | 62/364 (17%)                     | 55/341 (16%)           | 1.05 (0.56-1.97)                                   |
| <b>Worry about getting COVID-19 during Phase 2</b>                                |                                        |                                  |                        |                                                    |
| Less worried                                                                      | 87/704 (12%)                           | 47/364 (13%)                     | 40/340 (12%)           | 1.16 (0.72-1.87)                                   |

| Variable                                                                                                       | Total with sexual health need<br>N=706 | At least one need unmet<br>N=365 | All needs met<br>N=341 | Unadjusted Odds Ratio<br>[95% Confidence Interval] |
|----------------------------------------------------------------------------------------------------------------|----------------------------------------|----------------------------------|------------------------|----------------------------------------------------|
| No change                                                                                                      | 310/704 (44%)                          | 156/364 (43%)                    | 154/340 (45%)          | Ref                                                |
| More worried                                                                                                   | 307/704 (44%)                          | 161/364 (44%)                    | 146/340 (43%)          | 1.09 (0.79-1.49)                                   |
| <b>Comfortable accessing in-person sexual health and testing services during the COVID-19 pandemic</b>         |                                        |                                  |                        |                                                    |
| Strongly agree / agree                                                                                         | 418/700 (60%)                          | 152/363 (42%)                    | 266/337 (79%)          | <b>0.19 (0.14-0.27)</b>                            |
| Neither / disagree / strongly disagree                                                                         | 282/700 (40%)                          | 211/363 (58%)                    | 71/337 (21%)           | Ref                                                |
| <b>Feel ashamed if people knew about my sex life / others will judge me for having sex during the pandemic</b> |                                        |                                  |                        |                                                    |
| Strongly agree / agree                                                                                         | 326/703 (46%)                          | 166/362 (46%)                    | 160/341 (47%)          | 0.96 (0.71-1.29)                                   |
| Neither / disagree / strongly disagree                                                                         | 377/703 (54%)                          | 196/362 (54%)                    | 181/341 (53%)          | Ref                                                |
| <b>GetCheckedOnline user</b>                                                                                   | 545/706 (77%)                          | 267/365 (73%)                    | 278/341 (82%)          | <b>0.62 (0.43-0.88)</b>                            |

\*Reference level: Other, including Very Unlikely, Unlikely, and Neither Likely nor Unlikely

BOLD: 95% confidence interval excludes 1

*Denominators for each variable exclude missing values. Column percentages were calculated excluding missing values per variable.*
