# Supplementary material for: Accessing needed sexual health services during the COVID-19 pandemic in British Columbia, Canada: a survey of sexual health service clients
Source: HighWire-hosted journal article supplement (doi:10.1136/sextrans-2021-055013), 2021-11-05
Supplement: sextrans-2021-055013supp003_data_supplement.pdf [file sextrans-2021-055013supp003_data_supplement.pdf]

**Supplemental Table 2: Acceptability of alternative models to in-person sexual health services and association with being a GetCheckedOnline (vs. STI clinic) client**

| Variable                                                                                               | Total with sexual health need<br>N=706 | STI clinic client<br>N=185 | GetCheckedOnline client<br>N=521 | Unadjusted Odds Ratio*<br>[95% Confidence Interval] |
|--------------------------------------------------------------------------------------------------------|----------------------------------------|----------------------------|----------------------------------|-----------------------------------------------------|
| <b>Likelihood of using the following services</b><br>(very likely/likely vs other):                    |                                        |                            |                                  |                                                     |
| Home self-collection kits for testing                                                                  | 634/706<br>(90%)                       | 164/185 (89%)              | 470/521 (90%)                    | 1.18 (0.68-2.00)                                    |
| Receiving test kits or antibiotics at home, in plain packaging                                         | 592/700<br>(85%)                       | 161/185 (87%)              | 431/515 (84%)                    | 0.76 (0.46-1.23)                                    |
| Express testing service, where after a phone/video assessment go to clinic to have specimens collected | 565/706<br>(80%)                       | 160/185 (86%)              | 405/521 (78%)                    | <b>0.55 (0.33-0.86)</b>                             |
| Text messaging service that provides STI results                                                       | 530/700<br>(76%)                       | 145/184 (79%)              | 385/516 (75%)                    | 0.79 (0.52-1.18)                                    |
| Phone call with sexual health care provider to discuss sexual health                                   | 481/704<br>(68%)                       | 140/183 (77%)              | 341/521 (65%)                    | <b>0.58 (0.39-0.85)</b>                             |
| Sending a picture of a rash or lesion to a health care provider                                        | 461/702<br>(66%)                       | 128/185 (69%)              | 333/517 (64%)                    | 0.81 (0.56-1.15)                                    |
| Text messaging service for reminders (e.g., medications, appointments)                                 | 473/701<br>(67%)                       | 136/185 (74%)              | 337/516 (65%)                    | <b>0.68 (0.46-0.98)</b>                             |
| Video visit with sexual health care providers to discuss sexual health                                 | 405/703<br>(58%)                       | 111/185 (60%)              | 294/518 (57%)                    | 0.88 (0.62-1.23)                                    |
| Texting with a sexual health care provider to discuss sexual health                                    | 374/699<br>(54%)                       | 104/184 (57%)              | 270/515 (52%)                    | 0.85 (0.60-1.19)                                    |

\*Reference level: Other, including Very Unlikely, Unlikely, and Neither Likely nor Unlikely

**BOLD:** 95% confidence interval excludes 1

*Denominators for each variable exclude missing values. Column percentages were calculated excluding missing values per variable.*
