# Supplementary figures and images for: Accessing needed sexual health services during the COVID-19 pandemic in British Columbia, Canada: a survey of sexual health service clients
Source: HighWire-hosted journal article supplement (doi:10.1136/sextrans-2021-055013), 2021-11-05

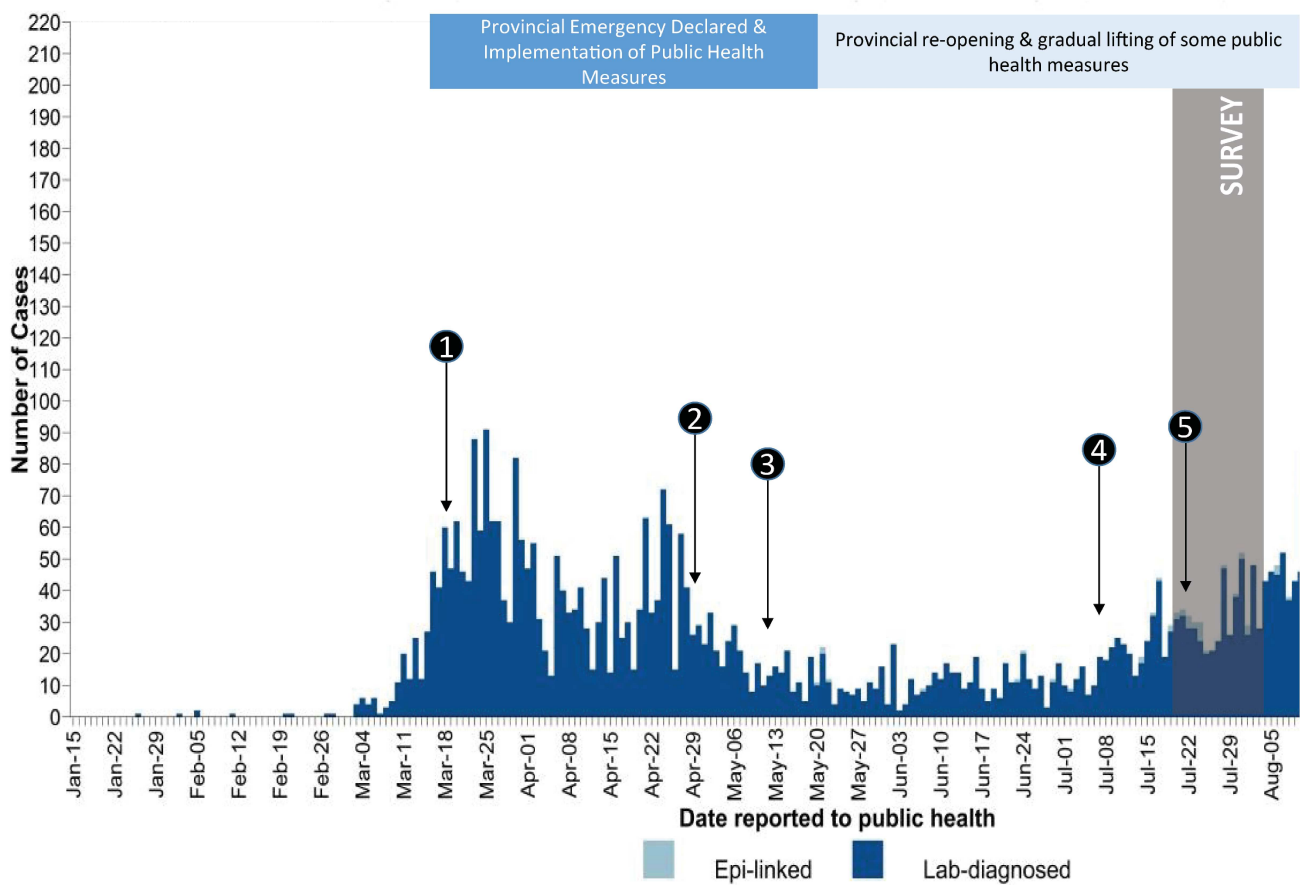

Supplement: sextrans-2021-055013supp001_data_supplement.pdf [file sextrans-2021-055013supp001_data_supplement.pdf]
